# Supplementary material for: The effects of chondroitin sulfate and serum albumin on the fibrillation of human islet amyloid polypeptide at phospholipid membranes
Source: Royal Society of Chemistry journal article supplement (doi:10.1039/c5cp07642k), 2016-01-01
Supplement: c5cp07642k1.pdf [file c5cp07642k1.pdf]

Electronic Supplementary Material (ESI) for Physical Chemistry Chemical  
Physics.

This journal is © the Owner Societies 2016

## Supplementary Information

### The Effects of Chondroitin Sulfate and Serum Albumin on the Fibrillation of Human Islet Amyloid Polypeptide at Phospholipid Membranes

Yang Li, Li Wang, Tong Lu, Ying Wei, Fei Li\*

State Key Laboratory of Supramolecular Structure and Materials, College of Chemistry, Jilin University,  
Changchun 130012, P. R. China.

#### 1. Methods

##### 1.1 Simulation of Thioflavin T Fluorescence Kinetics

Time-dependent ThT fluorescence curves were fitted using a sigmoidal growth model and the data of the lag time ( $T_{lag}$ ), the time required to reach half of the fluorescence intensity ( $T_{50}$ ) and the apparent first-order constant ( $k$ ) were calculated using eqs 1 and 2.<sup>1,2</sup>

$$Y = Y_0 + (Y_{max} - Y_0) / (1 + \exp - (T - T_{50}) / k) \quad (1)$$

$$T_{lag} = T_{50} - 2/k \quad (2)$$

Where  $Y_{max}$  and  $Y_0$  are the maximum and initial fluorescence intensity, respectively.

##### 1.2 Calculation of the Secondary Structure Contents

The secondary structure contents were calculated by the CDPro software package using the program CONTIN. A reference set of SMP56 including 56 proteins was used in the analyses of CD data.<sup>3</sup>

## 2. Supplementary Figures and Tables

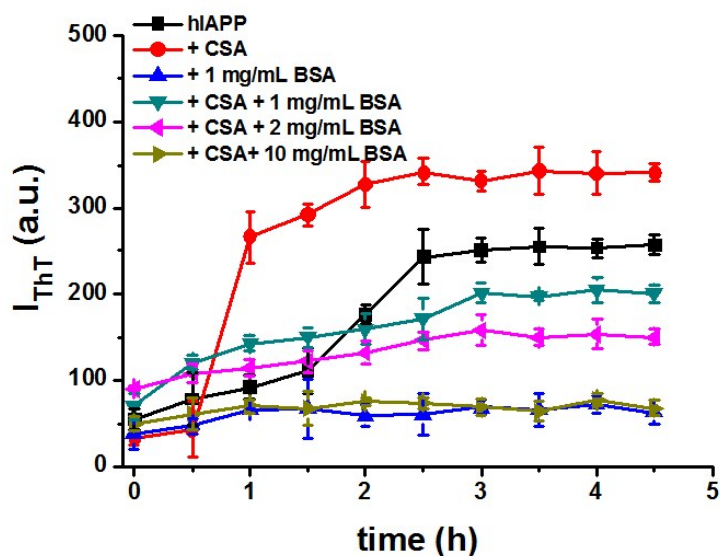

**Figure S1** The effects of CSA (0.06 mg/mL) and varying concentrations of BSA on the amyloid fibrillation of hIAPP (15  $\mu$ M or 0.06 mg/mL) incubated with POPC LUVs at a P:L of 1:200, monitored by the ThT binding assays.

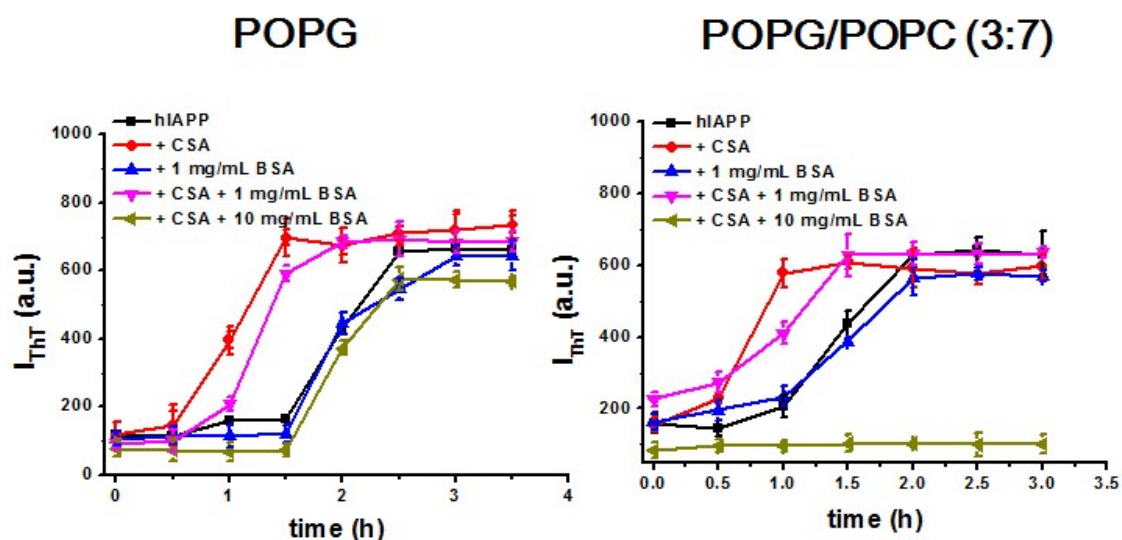

**Figure S2** The effects of CSA (0.06 mg/mL) and varying concentrations of BSA on the amyloid fibrillation of hIAPP (15  $\mu$ M or 0.06 mg/mL) incubated with POPG LUVs and POPG/POPC 3:7 LUVs at a P:L of 1:200, monitored by the ThT binding assays.

**Table S1** The data obtained from the ThT binding assays of 0.06 mg/mL hIAPP in

PBS (pH 7.4) containing various concentrations of CSA and CSA+BSA.

| Peptide                       | T <sub>lag</sub> (h) | T <sub>50</sub> (h) | Y <sub>max</sub> |
|-------------------------------|----------------------|---------------------|------------------|
| hIAPP                         | 3.75                 | 4.40                | 78.78            |
| + 0.012 mg/mL CSA             | 2.38                 | 3.03                | 507.07           |
| + 0.06 mg/mL CSA              | 2.2                  | 2.6                 | 375.98           |
| + 0.3 mg/mL CSA               | 0.97                 | 1.32                | 241.41           |
| + 0.3 mg/mL CSA + 1 mg/mL BSA | 0.62                 | 2.96                | 72.09            |

**Table S2** The data obtained from the ThT binding assays of 0.06 mg/mL hIAPP in POPC LUV solutions containing various concentrations of CSA and CSA+BSA at pH 7.4.

| P:L   | Peptide                        | T <sub>lag</sub> (h) | T <sub>50</sub> (h) | Y <sub>max</sub> |
|-------|--------------------------------|----------------------|---------------------|------------------|
| 1:25  | hIAPP                          | 1.13                 | 1.49                | 167.08           |
|       | + 0.06 mg/mL CSA               | 0.28                 | 0.36                | 255.67           |
|       | + 0.06 mg/mL CSA + 1 mg/mL BSA | 0                    | 1.72                | 143.53           |
|       | + 0.06 mg/mL CSA + 2 mg/mL BSA | 0                    | 2.11                | 94.98            |
| 1:200 | hIAPP                          | 1.16                 | 1.82                | 258.92           |
|       | + 0.06 mg/mL CSA               | 0.62                 | 0.84                | 328.7            |
|       | + 0.06 mg/mL CSA + 1 mg/mL BSA | 0                    | 1.51                | 213.3            |
|       | + 0.06 mg/mL CSA + 2 mg/mL BSA | 0                    | 1.60                | 145.68           |

**Table S3** The data obtained from the ThT binding assays of 0.06 mg/mL hIAPP in POPG LUV solutions containing various concentrations of CSA, BSA and CSA+BSA at pH 7.4.

| P:L   | Peptide                         | T <sub>lag</sub> (min) | T <sub>50</sub> (min) | Y <sub>max</sub> |
|-------|---------------------------------|------------------------|-----------------------|------------------|
| 1:25  | hIAPP                           | 18.04                  | 22.05                 | 345.07           |
|       | + 0.06 mg/mL CSA                | 15.08                  | 22.98                 | 568.29           |
|       | + 0.3 mg/mL CSA                 | 13.08                  | 18.78                 | 885.72           |
|       | + 1 mg/mL BSA                   | 14.34                  | 21.2                  | 384.5            |
|       | + 10 mg/mL BSA                  | 12.71                  | 18.53                 | 316.84           |
|       | + 0.06 mg/mL CSA + 1 mg/mL BSA  | 14.08                  | 25.27                 | 336.16           |
| 1:200 | hIAPP                           | 96                     | 116.4                 | 547.58           |
|       | + 0.06 mg/mL CSA                | 42.6                   | 60.6                  | 585.15           |
|       | + 1 mg/mL BSA                   | 99                     | 114.6                 | 614.72           |
|       | + 0.06 mg/mL CSA + 1 mg/mL BSA  | 114.6                  | 73.8                  | 688.92           |
|       | + 0.06 mg/mL CSA + 10 mg/mL BSA | 117.6                  | 88.8                  | 571.26           |

**Table S4** The data obtained from the ThT binding assays of 0.06 mg/mL hIAPP in POPG/POPC 3:7 LUV solutions containing various concentrations of CSA, BSA

and CSA + BSA at pH 7.4.

| P:L   | Peptide                        | T <sub>lag</sub> (min) | T <sub>50</sub> (min) | Y <sub>max</sub> |
|-------|--------------------------------|------------------------|-----------------------|------------------|
| 1:25  | hIAPP                          | 16.74                  | 20.10                 | 662.9            |
|       | + 0.06 mg/mL CSA               | 14.12                  | 17.92                 | 550.7            |
|       | + 0.3 mg/mL CSA                | 11.15                  | 14.59                 | 663.1            |
|       | + 1 mg/mL BSA                  | 13.24                  | 16.6                  | 499.93           |
|       | + 0.06 mg/mL CSA + 1 mg/mL BSA | 15.9                   | 20.33                 | 783.29           |
| 1:200 | hIAPP                          | 61.2                   | 85.2                  | 646.92           |
|       | + 0.06 mg/mL CSA               | 27.6                   | 39.6                  | 608.61           |
|       | + 1 mg/mL BSA                  | 65.4                   | 88.2                  | 577.09           |
|       | + 0.06 mg/mL CSA + 1 mg/mL BSA | 94.8                   | 61.2                  | 636.48           |

**Table S5** The secondary structure data for 0.2 mg/mL hIAPP in PBS at pH 7.4 in the absence and presence of 0.2 mg/mL CSA obtained by the CD measurements.

| Peptide     | Time (h) | Secondary structure (%) |        |      |           |
|-------------|----------|-------------------------|--------|------|-----------|
|             |          | Helix                   | Strand | Turn | Unordered |
| hIAPP       | 0        | 6                       | 28     | 55.3 | 11.7      |
|             | 1        | 5.2                     | 27.8   | 55   | 12        |
|             | 2        | 5.3                     | 28.1   | 54.6 | 12        |
|             | 3        | 5                       | 50.3   | 32.9 | 11.7      |
|             | 4        | 5.4                     | 49.5   | 33.4 | 11.8      |
|             | 5        | 4.6                     | 50.6   | 32.9 | 11.9      |
| hIAPP + CSA | 0        | 35.9                    | 20.8   | 33.2 | 10.1      |
|             | 1        | 5.1                     | 48.5   | 34.2 | 12.2      |
|             | 2        | 4.4                     | 50.3   | 33.1 | 12.2      |
|             | 3        | 4.3                     | 50.6   | 32.9 | 12.3      |
|             | 4        | 4.6                     | 51     | 32.6 | 11.8      |
|             | 5        | 4.5                     | 50.3   | 33.3 | 11.9      |

**Table S6** The secondary structure data for 0.2 mg/mL hIAPP incubated with POPC LUVs at a P:L of 1:25 at pH 7.4 in the absence and presence of 0.2 mg/mL CSA obtained by the CD measurements.

| Peptide     | Time (h) | Secondary structure (%) |        |      |           |
|-------------|----------|-------------------------|--------|------|-----------|
|             |          | Helix                   | Strand | Turn | Unordered |
| hIAPP       | 0        | 5.4                     | 27.7   | 54.8 | 12.2      |
|             | 1        | 5.2                     | 27.6   | 54.9 | 12.3      |
|             | 2        | 5.6                     | 28.6   | 53.3 | 12.5      |
|             | 3        | 4.5                     | 49.8   | 34.2 | 11.5      |
| hIAPP + CSA | 0        | 43.8                    | 9.9    | 33   | 13.3      |
|             | 1        | 15.7                    | 38.4   | 34   | 12        |
|             | 2        | 11.4                    | 38.2   | 28.4 | 10.9      |
|             | 3        | 6.8                     | 42.6   | 37.4 | 13.3      |

**Table S7** The secondary structure data for 0.2 mg/mL hIAPP incubated with POPG LUVs at a P:L of 1:25 at pH 7.4 in the absence and presence of 0.2 mg/mL CSA obtained by the CD measurements.

| Peptide     | Time (min) | Secondary structure (%) |        |      |           |
|-------------|------------|-------------------------|--------|------|-----------|
|             |            | Helix                   | Strand | Turn | Unordered |
| hIAPP       | 0          | 45.1                    | 14.9   | 29.8 | 10.3      |
|             | 15         | 48.3                    | 9.8    | 30.3 | 11.6      |
|             | 30         | 43.8                    | 15.2   | 25.7 | 15.1      |
|             | 45         | 5.8                     | 55.4   | 24.3 | 14.6      |
|             | 60         | 8.6                     | 58.7   | 26.8 | 15.9      |
| hIAPP + CSA | 0          | 43.5                    | 15.5   | 28.8 | 12.2      |
|             | 15         | 46.4                    | 9.8    | 31.4 | 12.4      |
|             | 30         | 46.1                    | 14.2   | 28.4 | 11.3      |
|             | 45         | 5.6                     | 59.4   | 24.3 | 10.7      |
|             | 60         | 5.3                     | 59.7   | 23.2 | 11.7      |

## References

- [1] N. N. Jha, A. Anoop, S. Ranganathan, G. M. Mohite, R. Padinhateeri and S. K. Maji, *Biochemistry*, 2013, 52, 8800–8810.
- [2] C. A. De Carufel, N. Quittot, P. T. Nguyen and S. Bourgault, *Angew. Chem. Int. Ed.*, 2015, 54, 14383–14387.
- [3] N. J. Greenfield, *Nat Protoc.*, 2006, 1, 2876–2890.
